# Supplementary material
Source: Research Square preprint supplement (doi:10.21203/rs.3.rs-9305065/v1)
Supplement: Supplementary file 1 [file 14166a56e83cacf8f5bd9d6d.pdf]

**Problem and Context:**  
**Low-Cost Precision Smart Agriculture**

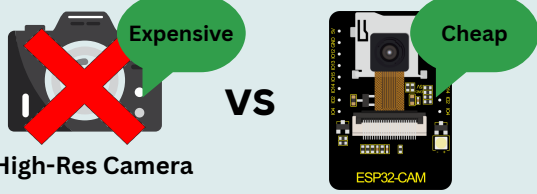

High resolution cameras are expensive and consume quite a lot of power.

**Methodology: Applying several SR models to find out the model that fits the real problem.**

**Solution: Low-resolution, low-priced camera with Super-Resolution implementation for resolution enhancement**

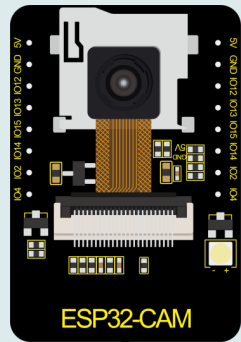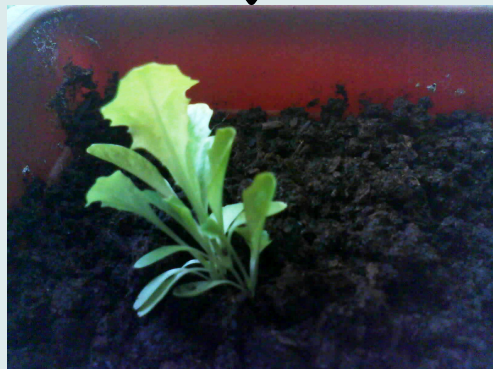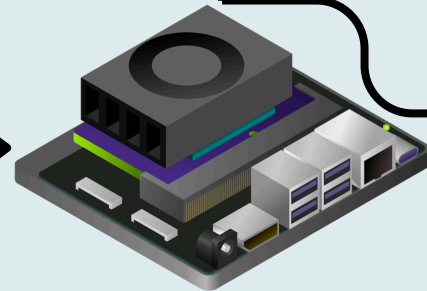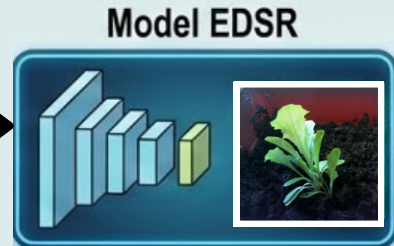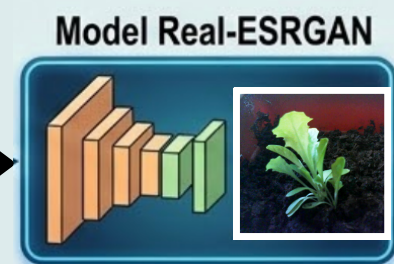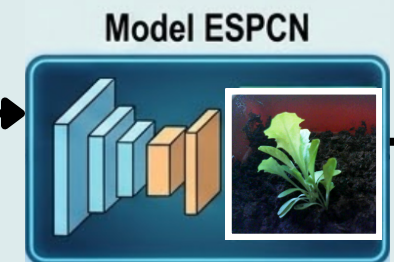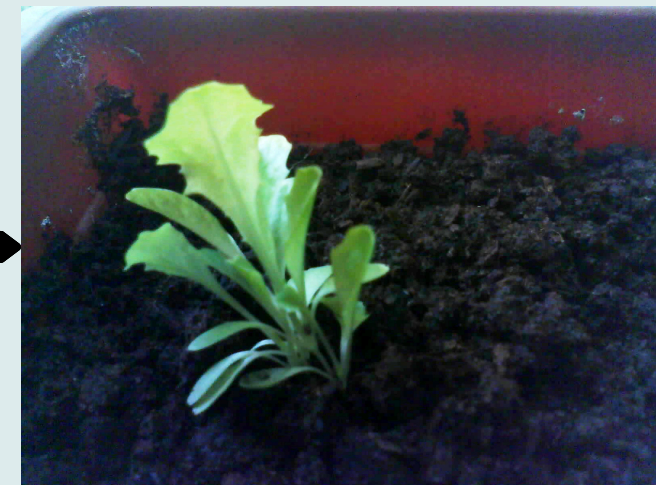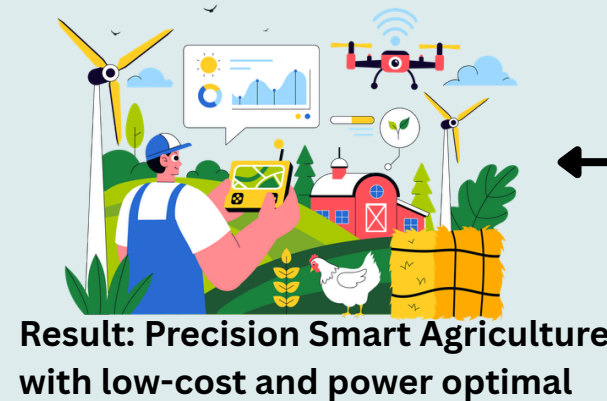

| Model       | Computational Load & Latency | Power Consumption | Key Notes                           |
|-------------|------------------------------|-------------------|-------------------------------------|
| Icon Key    | ★★ ★                         | ★                 |                                     |
| Real-ESRGAN | ★★ ★                         | ★★ ★★ ★           | Highest Quality, High Cost & Energy |
| EDSR        | ★★ ★                         | ★★ ★              | Best Balance                        |
| ESPCN       | ★ ★                          | ★★ ★              | Highest Efficiency, Reduced Detail  |
